# Supplementary material for: A Quality-Based Review of Randomized Controlled Trials of Psychodynamic Psychotherapy
Source: Atypon-hosted journal article supplement (doi:10.1176/appi.ajp.2010.08060843), 2010-09-16
Supplement: ajp_168_01_019_01.pdf [file ajp_168_01_019_01.pdf]

**Table S1. List of 94 randomized controlled trials of psychodynamic psychotherapy included in this quality-based review. TAU = treatment as usual, BPD = borderline personality disorder, PTSD = posttraumatic stress disorder  
 Bold = 25 trials that provide supporting evidence for the efficacy of psychodynamic psychotherapy**

| <b>Authors &amp; Year</b>                                                         | <b>Patient Description</b>    | <b>Treatment and Comparison Groups</b>                                                                  | <b>Total Sample Size</b> | <b>Outcome</b>                           | <b>Total Quality Score</b> | <b>Item 25 Score</b> |
|-----------------------------------------------------------------------------------|-------------------------------|---------------------------------------------------------------------------------------------------------|--------------------------|------------------------------------------|----------------------------|----------------------|
| <b>1. Abbass, Sheldon, Gyra &amp; Kalpin, 2008</b>                                | <b>Personality disorders</b>  | <b>Intensive short-term dynamic vs. Delayed treatment control (inactive)</b>                            | <b>27</b>                | <b>Dynamic superior</b>                  | <b>27</b>                  | <b>5</b>             |
| <b>2. Bachar, Latzer, Kreitler &amp; Berry, 1999</b>                              | <b>Anorexia &amp; Bulimia</b> | <b>Self-psychology vs. Cognitive orientation (inactive) vs. Nutritional counseling only (inactive)</b>  | <b>33</b>                | <b>Dynamic superior to both inactive</b> | <b>26</b>                  | <b>4</b>             |
| 3. Barkham, Rees, Shapiro, Stiles, Agnew, Halstead, Culverwell & Harrington, 1996 | Depression                    | Psychodynamic-interpersonal (PI) 8 sess vs. PI 16 sess vs. CBT 8 sess (active) vs. CBT 16 sess (active) | 36                       | No difference                            | 29                         | 4                    |
| 4. Barkham, Shapiro, Hardy & Rees, 1999                                           | Subsyndromal depression       | Very brief psychodynamic-interpersonal vs. CBT (active)                                                 | 116                      | No difference                            | 25.1                       | 4                    |

|                                           |              |                                                                                                      |            |                                                                  |             |          |
|-------------------------------------------|--------------|------------------------------------------------------------------------------------------------------|------------|------------------------------------------------------------------|-------------|----------|
| 5. Bassett & Pilowsky, 1985               | Chronic pain | Psychodynamic vs. Cognitive-supportive (active)                                                      | 26         | No difference                                                    | 10          | 1        |
| <b>6. Bateman &amp; Fonagy, 1999</b>      | <b>BPD</b>   | <b>Mentalization-based partial hospital vs. TAU (inactive)</b>                                       | <b>38</b>  | <b>Dynamic superior</b>                                          | <b>29.5</b> | <b>6</b> |
| <b>7. Bateman &amp; Fonagy, 2009</b>      | <b>BPD</b>   | <b>Mentalization-based outpatient vs. TAU (inactive)</b>                                             | <b>134</b> | <b>Dynamic superior</b>                                          | <b>45</b>   | <b>7</b> |
| 8. Beutel, Thiede, Wiltink & Sobez, 2001  | Obesity      | Psychodynamic psychosomatic rehabilitation vs. Inpatient behavioral (active)                         | 98         | No difference                                                    | 22.9        | 4        |
| 9. Brockman, Poynton, Ryle & Watson, 1987 | Mixed        | Brief interpretive vs. cognitive analytic therapy (active)                                           | 48         | No non-dynamic comparator                                        | 14          | 2        |
| 10. Brodaty & Andrews, 1983               | Mixed        | Brief problem-oriented vs. Family-practitioner therapy (active) vs. No intervention (inactive)       | 18         | No difference with active or inactive                            | 24          | 3        |
| 11. Brom, Kleber & Defares, 1989          | PTSD         | Psychodynamic vs. Trauma desensitization (active) vs. Hypnotherapy (active) vs. Wait-list (inactive) | 112        | No difference with either active. Dynamic superior to Wait-list. | 23          | 5        |

|                                                                      |                               |                                                                                                           |            |                                                                                              |           |          |
|----------------------------------------------------------------------|-------------------------------|-----------------------------------------------------------------------------------------------------------|------------|----------------------------------------------------------------------------------------------|-----------|----------|
| 12. Budman, Demby, Redondo, Hannan, Feldstein, Ring & Springer, 1988 | Mixed                         | Individual time-limited dynamic vs. Group time-limited dynamic therapy (active)                           | 98         | No non-dynamic comparator                                                                    | 19        | 3        |
| <b>13. Burnand, Andreoli, Kolatte, Venturini &amp; Rosset, 2002</b>  | <b>Depression</b>             | <b>Dynamic therapy + clomipramine vs. Clomipramine alone (active)</b>                                     | <b>74</b>  | <b>Dynamic superior</b>                                                                      | <b>27</b> | <b>4</b> |
| 14. Clarkin, Levy, Lenzenweger & Kernberg, 2007                      | BPD                           | Transference-Focused Psychotherapy vs. DBT (active) vs. Supportive (active)                               | 90         | No difference with either active                                                             | 26        | 4        |
| <b>15. Cooper, Murray, Wilson &amp; Romaniuk, 2003</b>               | <b>Post-partum depression</b> | <b>Psychodynamic vs. CBT (active) vs. Non-directive counseling (inactive) vs. Primary care (inactive)</b> | <b>193</b> | <b>No difference with CBT or non-directive counseling. Dynamic superior to primary care.</b> | <b>37</b> | <b>5</b> |
| 16. Covi, Lipman, Derogatis, Smith & Pattison, 1974                  | Depression                    | Psychodynamic group + med randomization vs. Supportive + med randomization (active)                       | 218        | No difference with active                                                                    | 21        | 4        |
| 17. Covi & Lipman, 1987                                              | Depression                    | "Traditional" dynamic group therapy vs. Group CBT (active) vs. Group CBT + imipramine (active)            | 70         | Dynamic inferior to both active                                                              | 12        | 3        |

|                                                                                                                                                                                                    |                                 |                                                                                                                                                |            |                                                                                                                                        |           |          |
|----------------------------------------------------------------------------------------------------------------------------------------------------------------------------------------------------|---------------------------------|------------------------------------------------------------------------------------------------------------------------------------------------|------------|----------------------------------------------------------------------------------------------------------------------------------------|-----------|----------|
| <b>18. Creed, Fernandes, Guthrie, Palmer, Ratcliffe, Read, Rigby, Thompson &amp; Tomenson, 2003</b>                                                                                                | <b>Irritable bowel syndrome</b> | <b>Brief psychodynamic-interpersonal vs. SSRI (active) vs. TAU (inactive)</b>                                                                  | <b>257</b> | <b>No difference with active. Dynamic superior to inactive.</b>                                                                        | <b>40</b> | <b>6</b> |
| 19. Crits-Christoph, Siqueland, Blaine, Frank, Luborsky, Onken, Muenz, Thase, Weiss, Gastfriend, Woody, Barber, Butler, Daley, Salloum, Bishop, Najavits, Lis, Mercer, Griffin, Moras & Beck, 1999 | Substance abuse cocaine         | Supportive-expressive psychodynamic vs. Cognitive (active). vs. Individual drug counseling (active) vs. Group drug counseling alone (inactive) | 487        | Dynamic inferior to individual drug counseling. No difference with cognitive or group drug counseling alone.                           | 42        | 7        |
| 20. Cummings & Wittenberg, 2008                                                                                                                                                                    | Child disruptive disorder       | Support-expressive parent-child vs. Incredible Years parenting (active)                                                                        | 37         | No difference                                                                                                                          | 23        | 4        |
| <b>21. Dare, Eisler, Russell, Treasure &amp; Dodge, 2001</b>                                                                                                                                       | <b>Anorexia</b>                 | <b>Focal psychoanalytic vs. Cognitive-analytic vs. Family (active) vs. TAU (inactive)</b>                                                      | <b>84</b>  | <b>Focal psychoanalytic superior to TAU. No difference with family. Cognitive-analytic is a dynamic therapy with unclear findings.</b> | <b>28</b> | <b>4</b> |

|                                                                                                            |                              |                                                                                                |            |                                                          |           |          |
|------------------------------------------------------------------------------------------------------------|------------------------------|------------------------------------------------------------------------------------------------|------------|----------------------------------------------------------|-----------|----------|
| 22. de Jonghe, Hendriksen, van Aalst, Kool, Peen, Van, van den Eijnden & Dekker, 2004                      | Depression                   | Short psychodynamic supportive + antidepressants vs. Short psychodynamic supportive alone      | 191        | No non-dynamic comparator                                | 35        | 6        |
| <b>23. Doering, Hörz, Rentrop, Fischer-Kern, Schuster, Benecke, Buchheim, Martius &amp; Buchheim, 2010</b> | <b>BPD</b>                   | <b>Transference-focused psychotherapy vs. TAU by experienced community therapists (active)</b> | <b>104</b> | <b>Dynamic superior</b>                                  | <b>32</b> | <b>5</b> |
| 24. Durham, Murphy, Allan, Richard, Treliving & Fenton, 1994                                               | Generalized anxiety disorder | Analytic vs. Cognitive (active) vs. Anxiety management training (inactive)                     | 99         | Dynamic inferior to active. No difference with inactive. | 29        | 5        |
| 25. Emmelkamp, Benner, Kuipers, Feiertag, Koster & Van Apeldoorn, 2006                                     | Avoidant personality         | Brief dynamic vs. CBT (active) vs. Wait-list (inactive)                                        | 62         | Dynamic inferior to CBT. No difference with wait-list.   | 24        | 5        |
| 26. Gallagher & Thompson, 1982                                                                             | Geriatric depression         | Brief relational vs. Cognitive (active) vs. Behavioral (active)                                | 30         | No difference with either active                         | 27        | 4        |
| 27. Gallagher-Thompson & Steffen, 1994                                                                     | Depression                   | Brief psychodynamic vs. CBT (active)                                                           | 66         | No difference                                            | 27        | 6        |
| 28. Garner, Rockert, Davis, Garner, Olmsted & Eagle, 1993                                                  | Bulimia                      | Supportive-expressive vs. CBT (active)                                                         | 60         | No difference                                            | 32        | 6        |

|                                                                                                       |                                               |                                                                              |            |                         |           |          |
|-------------------------------------------------------------------------------------------------------|-----------------------------------------------|------------------------------------------------------------------------------|------------|-------------------------|-----------|----------|
| <b>29. Gersons, Carlier, Lamberts &amp; van der Kolk, 2000</b>                                        | <b>PTSD</b>                                   | <b>Brief eclectic dynamic vs. Wait-list (inactive)</b>                       | <b>42</b>  | <b>Dynamic superior</b> | <b>36</b> | <b>6</b> |
| 30. Giesen-Bloo, van Dyck, Spinhoven, van Tilburg, Dirksen, van Asselt, Kremers, Nadort & Arntz, 2006 | BPD                                           | Transference-focused psychotherapy vs. Schema-focused psychotherapy (active) | 86         | Dynamic inferior        | 42        | 7        |
| 31. Gowers, Norton, Halek & Crisp, 1994                                                               | Anorexia                                      | Dynamic outpatient individual + family vs. no treatment (inactive)           | 40         | Dynamic superior        | 14        | 3        |
| <b>32. Gregory, Chlebowski, Kang, Remen, Soderberg &amp; Stepkovitch, 2008</b>                        | <b>BPD + Alcohol</b>                          | <b>Dynamic deconstructive vs. TAU (inactive)</b>                             | <b>30</b>  | <b>Dynamic superior</b> | <b>31</b> | <b>5</b> |
| 33. Gunderson, Frank, Katz, Vannicelli, Frosch & Knapp, 1984                                          | Schizophrenia                                 | Exploratory, insight-oriented vs. Reality-adaptive, supportive (active)      | 95         | No difference           | 29        | 5        |
| 34. Guthrie, Creed, Dawson & Tomenson, 1991                                                           | Irritable bowel syndrome                      | Brief psychodynamic-interpersonal + relaxation vs. TAU (inactive)            | 102        | Dynamic superior        | 23        | 4        |
| <b>35. Guthrie, Moorey, Margison, Barker, Palmer, McGrath, Tomenson &amp; Creed, 1999</b>             | <b>High utilizers of psychiatric services</b> | <b>Brief psychodynamic-interpersonal vs. TAU (inactive)</b>                  | <b>110</b> | <b>Dynamic superior</b> | <b>35</b> | <b>5</b> |

|                                                                                                                                      |                                     |                                                                                     |            |                           |             |          |
|--------------------------------------------------------------------------------------------------------------------------------------|-------------------------------------|-------------------------------------------------------------------------------------|------------|---------------------------|-------------|----------|
| <b>36. Guthrie, Kapur, Mackway-Jones, Chew-Graham, Moorey, Mendel, Marino-Francis, Sanderson, Turpin, Boddy &amp; Tomenson, 2001</b> | <b>Suicidality</b>                  | <b>Very brief psychodynamic-interpersonal vs. TAU (inactive)</b>                    | <b>119</b> | <b>Dynamic superior</b>   | <b>29.5</b> | <b>6</b> |
| 37. Hall & Crisp, 1987                                                                                                               | Anorexia                            | Individual + family therapy vs. Dietary advice (active)                             | 30         | No difference             | 16          | 3        |
| <b>38. Hamilton, Guthrie, Creed, Thompson, Tomenson, Bennett, Moriarty, Stephens &amp; Liston, 2000</b>                              | <b>Chronic functional dyspepsia</b> | <b>Brief psychodynamic-interpersonal vs. Supportive control (inactive)</b>          | <b>95</b>  | <b>Dynamic superior</b>   | <b>27</b>   | <b>5</b> |
| 39. Hellerstein, Rosenthal, Pinsker, Samstag, Muran & Winston, 1998                                                                  | Cluster C personality disorder      | Short-term dynamic vs. Brief supportive (active)                                    | 49         | No difference             | 30          | 5        |
| 40. Høglend, Amlo, Marble, Bøgwald, Sørbye, Sjaastad & Heyerdahl, 2006                                                               | Mixed                               | Dynamic w/transference interpretations vs. Dynamic w/o transference interpretations | 100        | No non-dynamic comparator | 29          | 4        |

|                                                                                                                                                                                           |                        |                                                                                                                                                     |           |                               |           |          |
|-------------------------------------------------------------------------------------------------------------------------------------------------------------------------------------------|------------------------|-----------------------------------------------------------------------------------------------------------------------------------------------------|-----------|-------------------------------|-----------|----------|
| 41. Keller, Pritsch, Von Wietersheim, Scheib, Osborn, Balck, Dilg, Schmelz-Schumacher, Doppl, Jantschek, Deter & German Study Group on Psychosocial Intervention in Crohn's Disease, 2004 | Crohn's disease        | Short-term psychodynamic + relaxation vs. No psychotherapy (inactive)                                                                               | 84        | No difference                 | 23        | 3        |
| 42. Kleinman, Woody, Todd, Millman, Kang, Kemp & Lipton, 1990                                                                                                                             | Crack or cocaine abuse | Supportive-expressive vs. Family (active) vs. Group (active)                                                                                        | 168       | No comparisons reported       | 23        | 3        |
| 43. Knekt & Lindfors, 2004                                                                                                                                                                | Depression or anxiety  | Short-term psychodynamic vs. Solution-focused (active)                                                                                              | 198       | No difference                 | 36        | 5        |
| <b>44. Knijnik, Salum, Blanco, Moraes, Hauck, Mombach, Strapasson, Manfro &amp; Eizirik, 2009</b>                                                                                         | <b>Social anxiety</b>  | <b>Psychodynamic group + Clonazepam vs. Clonazepam (active)</b>                                                                                     | <b>57</b> | <b>Dynamic superior</b>       | <b>24</b> | <b>3</b> |
| 45. Kornblith, Rehm, W & Lamparski, 1983                                                                                                                                                  | Depression             | Psychodynamic group vs. Self-reinforcement training group (active) vs. Self monitoring training group (active) vs. Didactic training group (active) | 58        | No difference with any active | 24        | 3        |
| 46. Lanza, Anderson, Boisvert, LeBlanc, Fardy & Steel, 2002                                                                                                                               | Violent behavior       | Psychodynamic group vs. CBT group (active)                                                                                                          | 10        | No difference                 | 11.5      | 2        |



|                                                                                                |                              |                                                                                   |           |                                                                        |           |          |
|------------------------------------------------------------------------------------------------|------------------------------|-----------------------------------------------------------------------------------|-----------|------------------------------------------------------------------------|-----------|----------|
| 47. Lau & Kristensen, 2007                                                                     | Childhood sexual abuse       | Analytic group vs. Systemic group (active)                                        | 82        | Dynamic inferior                                                       | 17        | 2        |
| 48. Leichsenring, Salzer, Jaeger, Kächele, Kreische, Leweke, Rüger, Winkelbach & Leibing, 2009 | Generalized anxiety          | Short-term psychodynamic psychotherapy vs. CBT (active)                           | 57        | No difference                                                          | 38        | 6        |
| 49. Linnet & Jemec, 2001                                                                       | Atopic dermatitis            | Brief dynamic vs. no treatment (inactive)                                         | 32        | No difference                                                          | 11        | 3        |
| 50. Maina, Forner & Bogetto, 2005                                                              | Minor depressive disorders   | Brief dynamic vs. Brief supportive (active) vs. Wait-list (inactive)              | 30        | No difference with active. Superior to inactive.                       | 22        | 3        |
| 51. Marmar, Horowitz, Weiss, Wilner & Kaltreider, 1988                                         | Women w/conjugal bereavement | Brief dynamic vs. Mutual help group (active)                                      | 61        | No difference                                                          | 18        | 4        |
| <b>52. McCallum &amp; Piper, 1990</b>                                                          | <b>Grief</b>                 | <b>Short-term psychoanalytic group vs. Wait-list (inactive)</b>                   | <b>79</b> | <b>Dynamic superior</b>                                                | <b>25</b> | <b>4</b> |
| 53. McLean & Hakstian, 1979                                                                    | Depression                   | Brief dynamic vs. Behavioral (active) vs. Drug (active) vs. Relaxation (inactive) | 178       | Dynamic inferior to behavioral. No difference with drug or relaxation. | 23        | 4        |
| 54. McMair, Links, Gnam, Guimond, Cardish, Korman & Streiner, 2009                             | BPD                          | Psychodynamic psychiatric management vs. DBT (active)                             | 180       | No difference                                                          | 44        | 7        |

|                                                                                                                             |               |                                                                                            |            |                           |           |          |
|-----------------------------------------------------------------------------------------------------------------------------|---------------|--------------------------------------------------------------------------------------------|------------|---------------------------|-----------|----------|
| 55. Meyer & Bolz, 1981                                                                                                      | Mixed         | Psychodynamic conflict-centered time-limited vs. Client-centered (active)                  | 68         | No difference             | 20        | 2        |
| <b>56. Milrod, Leon, Busch, Rudden, Schwalberg, Clarkin, Aronson, Singer, Turchin, Klass, Graf, Teres &amp; Shear, 2007</b> | <b>Panic</b>  | <b>Time-limited psychodynamic vs. Applied relaxation (active)</b>                          | <b>49</b>  | <b>Dynamic superior</b>   | <b>42</b> | <b>6</b> |
| 57. Munroe-Blum & Marziali, 1995                                                                                            | BPD           | Individual dynamic vs. Time-limited group                                                  | 110        | No non-dynamic comparator | 26        | 4        |
| 58. Öjehagen, Berglund, Appel, Andersson, Nilsson, Skjaeris & Wedlin-Toftenow, 1992                                         | Alcohol abuse | Psychodynamic counseling (1 or 2 years) vs. Multimodal behavioural (1 or 2 years) (active) | 72         | No difference             | 17        | 3        |
| 59. Pierloot & Vinck, 1978                                                                                                  | Anxiety       | Short-term dynamic therapy vs. Systematic desensitization (active)                         | 22         | No difference             | 8         | 2        |
| 60. Piper, Debbane, Bienvenu & Garant, 1984                                                                                 | Mixed         | Short individual dynamic vs. long individual vs. short group vs. long group                | 79         | No non-dynamic comparator | 8         | 2        |
| <b>61. Piper, Azim, McCallum &amp; Joyce, 1990</b>                                                                          | <b>Mixed</b>  | <b>Short-term psychodynamic vs. Wait-list (inactive)</b>                                   | <b>144</b> | <b>Dynamic superior</b>   | <b>26</b> | <b>5</b> |

|                                                                                        |                                            |                                                                                       |     |                                     |    |   |
|----------------------------------------------------------------------------------------|--------------------------------------------|---------------------------------------------------------------------------------------|-----|-------------------------------------|----|---|
| 62. Piper, McCallum, Joyce, Rosie & Ogrodniczuk, 2001                                  | Complicated grief                          | Interpretive short-term group vs. Supportive short-term group (active)                | 139 | No difference                       | 29 | 6 |
| 63. Poulsen, 1991                                                                      | Rheumatoid arthritis or Sjögren's syndrome | Psychodynamic time-limited group vs. Wait-list (inactive)                             | 46  | Dynamic superior                    | 10 | 2 |
| 64. Robin, Siegel, Moye, Gilroy, Dennis & Sikand, 1999                                 | Anorexia                                   | Ego-oriented individual vs. Behavioral family-systems (active)                        | 37  | Dynamic inferior                    | 20 | 4 |
| 65. Rosser, Denford, Heslop, Kinston, Macklin, Minty, Moynihan, Muir, Rein & Guz, 1983 | Chronic obstructive pulmonary disease      | Analytic vs. Supportive (active) vs. Nurse (inactive) vs. No psychotherapy (inactive) | 65  | Outcome not reported at termination | 12 | 2 |
| 66. Salminen, Karlsson, Hietala, Kajander, Aalto, Markkula, Rasi-Hakala & Toikka, 2008 | Major depression                           | Short-term psychodynamic vs. Fluoxetine (active)                                      | 51  | No difference                       | 28 | 5 |
| 67. Sanchez, Lewinsohn & Larson, 1980                                                  | Depression                                 | Traditional psychodynamic group vs. Group assertion (active)                          | 32  | Dynamic inferior                    | 16 | 2 |
| 68. Sandahl, Herlitz, Ahlin & Rönnerberg, 1998                                         | Alcohol dependence                         | Psychodynamic group vs. Cognitive-behavioral group (active)                           | 49  | Outcome not reported at termination | 22 | 4 |

|                                                             |                      |                                                                                                         |           |                                                          |           |          |
|-------------------------------------------------------------|----------------------|---------------------------------------------------------------------------------------------------------|-----------|----------------------------------------------------------|-----------|----------|
| 69. Saunders, 1996                                          | Partner-abusing men  | Process-psychodynamic group vs. Feminist-cognitive-behavioral group (active)                            | 126       | No difference                                            | 18        | 4        |
| 70. Shaffer, LaSalvia & Stein, 1997                         | Substance abuse      | Group dynamic + methadone vs. Yoga + methadone (active)                                                 | 61        | No difference                                            | 19        | 2        |
| 71. Shapiro, Barkham, Rees, Hardy, Reynolds & Startup, 1994 | Depression           | Psychodynamic-interpersonal (PI) 8 sess vs. PI 16 sess vs. CBT 8 sess (active) vs. CBT 16 sess (active) | 117       | No difference with either active                         | 35        | 7        |
| <b>72. Shefler, Dasberg &amp; Ben-Shakhar, 1995</b>         | <b>Mixed</b>         | <b>Time-limited dynamic vs. Wait-list (inactive)</b>                                                    | <b>33</b> | <b>Dynamic superior</b>                                  | <b>29</b> | <b>5</b> |
| 73. Simpson, Corney, Fitzgerald & Beecham, 2003             | Depression           | Psychodynamic counseling vs. TAU (inactive)                                                             | 145       | No difference                                            | 22        | 3        |
| 74. Sjodin, Svedlund, Ottosson & Dotevall, 1986             | Chronic peptic ulcer | Short-term psychodynamic + medical vs. medical only (inactive)                                          | 103       | No difference                                            | 8         | 3        |
| 75. Sloane, Staples, Cristol, Yorkston & Whipple, 1975      | Mixed                | Short-term analytic vs. Behavior (active) vs. Wait-list (inactive)                                      | 94        | No difference with active. Dynamic superior to inactive. | 6         | 1        |

|                                                                                                         |                                                             |                                                                                            |            |                                                                                     |           |          |
|---------------------------------------------------------------------------------------------------------|-------------------------------------------------------------|--------------------------------------------------------------------------------------------|------------|-------------------------------------------------------------------------------------|-----------|----------|
| 76. Smyrnios & Kirkby, 1993                                                                             | Mixed children                                              | Time unlimited vs. Time-limited psychodynamic vs. minimal-contact control (inactive)       | 30         | Time unlimited inferior to control. No difference between time-limited and control. | 16        | 2        |
| 77. Sørensen, Birket-Smith, Wattar, Buemann & Salkovskis, 2010                                          | Hypochondriasis                                             | Short-term psychodynamic vs. CBT (active) vs. Wait-list (inactive)                         | 80         | Dynamic inferior to CBT. No difference from Wait-list.                              | 34        | 5        |
| 78. Svartberg, Seltzer & Stiles, 1998                                                                   | Anxiety                                                     | Short-term anxiety-provoking vs. Nondirective non-dynamic (active)                         | 20         | No difference                                                                       | 30        | 5        |
| 79. Svartberg, Stiles & Seltzer, 2004                                                                   | Cluster C personality disorder                              | Short-term dynamic vs. Cognitive (active)                                                  | 50         | No difference                                                                       | 38        | 6        |
| 80. Svedlund, Sjodin, Ottosson & Dotevall, 1983                                                         | Irritable bowel syndrome                                    | Dynamically-oriented individual + medical vs. Medical only (inactive)                      | 101        | Dynamic superior                                                                    | 19        | 3        |
| <b>81. Szapocznik, Rio, Murray, Cohen, Scopetta, Rivas-Vazquez, Hervis, Posada &amp; Kurtines, 1989</b> | <b>Hispanic boys with behavioral and emotional problems</b> | <b>Individual psychodynamic vs. Structural family (active) vs. Recreational (inactive)</b> | <b>69</b>  | <b>No difference with active. Dynamic superior to inactive.</b>                     | <b>26</b> | <b>5</b> |
| <b>82. Tasca, Ritchie, Conrad, Balfour, Gayton, Lybanon &amp; Bissada, 2006</b>                         | <b>Binge eating disorder</b>                                | <b>Group Psychodynamic Interpersonal vs. Group CBT (active) vs. Wait-list (inactive)</b>   | <b>135</b> | <b>No difference with active. Dynamic superior to inactive.</b>                     | <b>39</b> | <b>6</b> |

|                                                                                                                                                               |                       |                                                                                             |     |                                                                |    |   |
|---------------------------------------------------------------------------------------------------------------------------------------------------------------|-----------------------|---------------------------------------------------------------------------------------------|-----|----------------------------------------------------------------|----|---|
| 83. Thompson, Gallagher & Breckenridge, 1987                                                                                                                  | Geriatric depression  | Brief psychodynamic vs. Behavioral (active) vs. Cognitive (active) vs. Wait-list (inactive) | 91  | No difference with either active. Dynamic superior to inactive | 18 | 4 |
| 84. Thyme, Sundin, Stahlberg, Lindstrom, Eklof & Wiberg, 2007                                                                                                 | Depressed women       | Short-term psychodynamic art vs. short-term psychodynamic verbal                            | 39  | No non-dynamic comparator                                      | 17 | 3 |
| 85. Treasure, Todd, Brolly, Tiller, Nehmed & Denman, 1995                                                                                                     | Anorexia              | Cognitive analytical vs. Educational behavioral (active)                                    | 30  | No difference                                                  | 21 | 2 |
| 86. Trowell, Kolvin, Weeramanthri, Sadowski, Berelowitz, Glaser, Leitch & Glasser, 2002                                                                       | Sexually abused girls | Focused individual vs. Psychoeducational group (active)                                     | 71  | No difference                                                  | 27 | 4 |
| 87. Trowell, Joffe, Campbell, Clemente, Almqvist, Soininen, Koskenranta-Aalto, Weintraub, Kolaitis, Tomaras, Anastasopoulos, Grayson, Barnes & Tsiantis, 2007 | Childhood depression  | Individual psychodynamic vs. Family therapy (active)                                        | 72  | No difference                                                  | 17 | 2 |
| 88. Vinnars, Barber, Norén, Gallop & Weinryb, 2005                                                                                                            | Personality disorders | Time-limited dynamic vs. community-delivered dynamic by experienced therapists              | 156 | No non-dynamic comparator                                      | 41 | 7 |

|                                                                                      |                                              |                                                                                                                                     |            |                                                                                                            |           |          |
|--------------------------------------------------------------------------------------|----------------------------------------------|-------------------------------------------------------------------------------------------------------------------------------------|------------|------------------------------------------------------------------------------------------------------------|-----------|----------|
| <b>89. Vitriol, Ballesteros, Florenzano, Weil &amp; Benadof, 2009</b>                | <b>Women w/depression + childhood trauma</b> | <b>Brief psychodynamic vs. TAU (inactive)</b>                                                                                       | <b>87</b>  | <b>Dynamic superior</b>                                                                                    | <b>27</b> | <b>4</b> |
| 90. Wiborg & Dahl, 1996                                                              | Panic disorder                               | Brief dynamic + clomipramine vs. Clomipramine alone (active)                                                                        | 40         | No difference                                                                                              | 27        | 5        |
| <b>91. Wiltink, Dippel, Szczepanski, Thiede, Alt &amp; Beutel, 2007</b>              | <b>Obesity</b>                               | <b>Psychodynamic inpatient vs. behavioral inpatient (active)</b>                                                                    | <b>267</b> | <b>No difference</b>                                                                                       | <b>26</b> | <b>4</b> |
| 92. Winston, Pollack, McCullough, Flegenheimer, Kestenbaum & Trujillo, 1991          | Cluster C personality disorder               | Short-term dynamic vs. Brief adaptational (dynamic) vs. Wait-list (inactive)                                                        | 49         | Dynamic superior to inactive.                                                                              | 22        | 3        |
| <b>93. Woody, Luborsky, McLellan, O'Brien, Beck, Blaine, Herman &amp; Hole, 1983</b> | <b>Opiate dependence</b>                     | <b>Supportive-expressive + drug counseling vs. CBT + drug counseling (active) vs. Drug counseling alone (active)</b>                | <b>110</b> | <b>Dynamic superior to drug counseling alone. No difference between dynamic and CBT + drug counseling.</b> | <b>32</b> | <b>6</b> |
| <b>94. Woody, McLellan, Luborsky &amp; O'Brien, 1995</b>                             | <b>Opiate dependence</b>                     | <b>Supportive-expressive + rehab counseling + methadone vs. Supplemental drug counseling + rehab counseling+ methadone (active)</b> | <b>84</b>  | <b>Dynamic superior</b>                                                                                    | <b>24</b> | <b>4</b> |

## References

- Abbass, A., Sheldon, A., Gyra, J., & Kalpin, A. (2008). Intensive short-term dynamic psychotherapy for DSM-IV personality disorders: a randomized controlled trial. *J Nerv Ment Dis, 196*, 211-216.
- Bachar, E., Latzer, Y., Kreitler, S., & Berry, E. M. (1999). Empirical comparison of two psychological therapies. Self psychology and cognitive orientation in the treatment of anorexia and bulimia. *J Psychother Pract Res, 8*, 115-128.
- Barkham, M., Rees, A., Shapiro, D. A., Stiles, W. B., Agnew, R. M., & Halstead, J., et al. (1996). Outcomes of time-limited psychotherapy in applied settings: replicating the Second Sheffield Psychotherapy Project. *J Consult Clin Psychol, 64*, 1079-1085.
- Barkham, M., Shapiro, D. A., Hardy, G. E., & Rees, A. (1999). Psychotherapy in two-plus-one sessions: outcomes of a randomized controlled trial of cognitive-behavioral and psychodynamic-interpersonal therapy for subsyndromal depression. *J Consult Clin Psychol, 67*, 201-211.
- Bassett, D. L., & Pilowsky, I. (1985). A study of brief psychotherapy for chronic pain. *J Psychosom Res, 29*, 259-264.
- Bateman, A., & Fonagy, P. (1999). Effectiveness of partial hospitalization in the treatment of borderline personality disorder: a randomized controlled trial. *Am J Psychiatry, 156*, 1563-1569.
- Bateman, A., & Fonagy, P. (2009). Randomized controlled trial of outpatient mentalization-based treatment versus structured clinical management for borderline personality disorder. *Am J Psychiatry, 166*, 1355-1364.
- Beutel, M., Thiede, R., Wiltink, J., & Sobez, I. (2001). Effectiveness of behavioral and psychodynamic in-patient treatment of severe obesity—first results from a randomized study. *Int J Obes, 25*, S96-S98.
- Brockman, B., Poynton, A., Ryle, A., & Watson, J. P. (1987). Effectiveness of time-limited therapy carried out by trainees. Comparison of two methods. *Br J Psychiatry, 151*, 602-610.
- Brodsky, H., & Andrews, G. (1983). Brief psychotherapy in family practice. A controlled prospective intervention trial. *Br J Psychiatry, 143*, 11-19.



- Brom, D., Kleber, R. J., & Defares, P. B. (1989). Brief psychotherapy for posttraumatic stress disorders. *J Consult Clin Psychol*, *57*, 607-612.
- Budman, S. H., Demby, A., Redondo, J. P., Hannan, M., Feldstein, M., & Ring, J., et al. (1988). Comparative outcome in time-limited individual and group psychotherapy. *Int J Group Psychother*, *38*, 63-86.
- Burnand, Y., Andreoli, A., Kolatte, E., Venturini, A., & Rosset, N. (2002). Psychodynamic psychotherapy and clomipramine in the treatment of major depression. *Psichiatria Serv*, *53*, 585-590.
- Clarkin, J. F., Levy, K. N., Lenzenweger, M. F., & Kernberg, O. F. (2007). Evaluating three treatments for borderline personality disorder: a multiwave study. *Am J Psychiatry*, *164*, 922-928.
- Cooper, P. J., Murray, L., Wilson, A., & Romaniuk, H. (2003). Controlled trial of the short- and long-term effect of psychological treatment of post-partum depression. I. Impact on maternal mood. *Br J Psychiatry*, *182*, 412-419.
- Covi, L., Lipman, R. S., Derogatis, L. R., Smith, J. E., & Pattison, J. H. (1974). Drugs and group psychotherapy in neurotic depression. *Am J Psychiatry*, *131*, 191-198.
- Covi, L., & Lipman, R. S. (1987). Cognitive behavioral group psychotherapy combined with imipramine in major depression. *Psychopharmacol Bull*, *23*, 173-176.
- Creed, F., Fernandes, L., Guthrie, E., Palmer, S., Ratcliffe, J., & Read, N., et al. (2003). The cost-effectiveness of psychotherapy and paroxetine for severe irritable bowel syndrome. *Gastroenterology*, *124*, 303-317.
- Crits-Christoph, P., Siqueland, L., Blaine, J., Frank, A., Luborsky, L., & Onken, L. S., et al. (1999). Psychosocial treatments for cocaine dependence: National Institute on Drug Abuse Collaborative Cocaine Treatment Study. *Arch Gen Psychiatry*, *56*, 493-502.
- Cummings, J. G., & Wittenberg, J. V. (2008). Supportive expressive therapy - Parent child version: an exploratory study. *Psychotherapy Theory, Research, Practice, Training*, *45*, 148-164.
- Dare, C., Eisler, I., Russell, G., Treasure, J., & Dodge, L. (2001). Psychological therapies for adults with anorexia nervosa: randomised controlled trial of out-patient treatments. *Br J Psychiatry*, *178*, 216-221.

de Jonghe, F., Hendriksen, M., van Aalst, G., Kool, S., Peen, J., & Van, R., et al. (2004). Psychotherapy alone and combined with pharmacotherapy in the treatment of depression. *British Journal of Psychiatry*, 185, 37-45.

Doering, S., Hörz, S., Rentrop, M., Fischer-Kern, M., Schuster, P., & Benecke, C., et al. (2010). Transference-focused psychotherapy v. treatment by community psychotherapists for borderline personality disorder: randomised controlled trial. *Br J Psychiatry*, 196, 389-395.

Durham, R. C., Murphy, T., Allan, T., Richard, K., Treliving, L. R., & Fenton, G. W., et al. (1994). Cognitive therapy, analytic psychotherapy and anxiety management training for generalised anxiety disorder. *Br J Psychiatry*, 165, 315-323.

Emmelkamp, P. M. G., Benner, A., Kuipers, A., Feiertag, G. A., Koster, H. C., & Van Apeldoorn, F. J., et al. (2006). Comparison of brief dynamic and cognitive-behavioural therapies in avoidant personality disorder. *Br J Psychiatry*, 189, 60-64.

Gallagher, D. E., & Thompson, L. W. (1982). Treatment of major depressive disorder in older adult outpatients with brief psychotherapies. *Psychotherapy: Theory, Research, and Practice*, 482-490.

Gallagher-Thompson, D., & Steffen, A. M. (1994). Comparative effects of cognitive-behavioral and brief psychodynamic psychotherapies for depressed family caregivers. *J Consult Clin Psychol*, 62, 543-549.

Garner, D. M., Rockert, W., Davis, R., Garner, M. V., Olmsted, M. P., & Eagle, M., et al. (1993). Comparison of cognitive-behavioral and supportive-expressive therapy for bulimia nervosa. *Am J Psychiatry*, 150, 37-46.

Gersons, B. P., Carlier, I. V., Lamberts, R. D., & van der Kolk, B. A. (2000). Randomized clinical trial of brief eclectic psychotherapy for police officers with posttraumatic stress disorder. *J Trauma Stress*, 13, 333-347.

Giesen-Bloo, J., van Dyck, R., Spinhoven, P., van Tilburg, W., Dirksen, C., & van Asselt, T., et al. (2006). Outpatient psychotherapy for borderline personality disorder: randomized trial of schema-focused therapy vs transference-focused psychotherapy. *Arch Gen Psychiatry*, 63, 649-658.

Gowers, S., Norton, K., Halek, C., & Crisp, A. H. (1994). Outcome of outpatient psychotherapy in a random allocation treatment study of anorexia nervosa. *Int J Eat Disord*, 15, 165-177.

Gregory, R. J., Chlebowski, S., Kang, D., Remen, A. L., Soderberg, M. G., & Stepkovitch, J., et al. (2008). A controlled trial of psychodynamic psychotherapy for co-occurring borderline personality disorder and alcohol use disorder. *Psychotherapy: Theory, Research, Practice, Training*, 45, 28-41.

Gunderson, J. G., Frank, A. F., Katz, H. M., Vannicelli, M. L., Frosch, J. P., & Knapp, P. H., et al. (1984). Effects of psychotherapy in schizophrenia: II. Comparative outcome of two forms of treatment. *Schizophr Bull*, 10, 564-598.

Guthrie, E., Creed, F., Dawson, D., & Tomenson, B. (1991). A controlled trial of psychological treatment for the irritable bowel syndrome. *Gastroenterology*, 100, 450-457.

Guthrie, E., Kapur, N., Mackway-Jones, K., Chew-Graham, C., Moorey, J., & Mendel, E., et al. (2001). Randomised controlled trial of brief psychological intervention after deliberate self poisoning. *BMJ*, 323, 135-138.

Guthrie, E., Moorey, J., Margison, F., Barker, H., Palmer, S., & McGrath, G., et al. (1999). Cost-effectiveness of brief psychodynamic-interpersonal therapy in high utilizers of psychiatric services. *Arch Gen Psychiatry*, 56, 519-526.

Hall, A., & Crisp, A. H. (1987). Brief psychotherapy in the treatment of anorexia nervosa: Outcome at one year. *British Journal of Psychiatry*, 151, 185-191.

Hamilton, J., Guthrie, E., Creed, F., Thompson, D., Tomenson, B., & Bennett, R., et al. (2000). A randomized controlled trial of psychotherapy in patients with chronic functional dyspepsia. *Gastroenterology*, 119, 661-669.

Hellerstein, D. J., Rosenthal, R. N., Pinsker, H., Samstag, L. W., Muran, J. C., & Winston, A., et al. (1998). A randomized prospective study comparing supportive and dynamic therapies. Outcome and alliance. *J Psychother Pract Res*, 7, 261-271.

Høglend, P., Amlo, S., Marble, A., Bøgwald, K. P., Sørbye, O., & Sjaastad, M. C., et al. (2006). Analysis of the patient-therapist relationship in dynamic psychotherapy: an experimental study of transference interpretations. *Am J Psychiatry*, 163, 1739-1746.

Keller, W., Pritsch, M., Von Wietersheim, J., Scheib, P., Osborn, W., & Balck, F., et al. (2004). Effect of psychotherapy and relaxation on the psychosocial and somatic course of Crohn's disease: main results of the German Prospective Multicenter Psychotherapy Treatment study on Crohn's Disease. *J Psychosom Res*, 56, 687-696.

- Kleinman, P. H., Woody, G. E., Todd, T. C., Millman, R. B., Kang, S. Y., & Kemp, J., et al. (1990). Crack and cocaine abusers in outpatient psychotherapy. *NIDA Res Monogr*, *104*, 24-35.
- Knekt, P., & Lindfors, O. (2004). *A randomized trial of the effect of four forms of psychotherapy on depressive and anxiety disorders*. Helsinki: Kela.
- Knijnik, D. Z., Salum, G. A., Blanco, C., Moraes, C., Hauck, S., & Mombach, C. K., et al. (2009). Defense style changes with the addition of psychodynamic group therapy to clonazepam in social anxiety disorder. *J Nerv Ment Dis*, *197*, 547-551.
- Kornblith, S., Rehm, L., W, O. M., & Lamparski, D. M. (1983). The contribution of self-reinforcement training and behavior assignments to the efficacy of self-control therapy for depression. *Cogn Ther Res*, *7*, 499-528.
- Lanza, M. L., Anderson, J., Boisvert, C. M., LeBlanc, A., Fardy, M., & Steel, B., et al. (2002). Assaultive behavior intervention in the Veterans Administration: psychodynamic group psychotherapy compared to cognitive behavior therapy. *Perspect Psychiatr Care*, *38*, 89-97.
- Lau, M., & Kristensen, E. (2007). Outcome of systemic and analytic group psychotherapy for adult women with history of intrafamilial childhood sexual abuse: a randomized controlled study. *Acta Psychiatr Scand*, *116*, 96-104.
- Leichsenring, F., Salzer, S., Jaeger, U., Kächele, H., Kreische, R., & Leweke, F., et al. (2009). Short-Term Psychodynamic Psychotherapy and Cognitive-Behavioral Therapy in Generalized Anxiety Disorder: A Randomized, Controlled Trial. *Am J Psychiatry*, *166*, 875-881.
- Linnet, J., & Jemec, G. B. (2001). Anxiety level and severity of skin condition predicts outcome of psychotherapy in atopic dermatitis patients. *Int J Dermatol*, *40*, 632-636.
- Maina, G., Forner, F., & Bogetto, F. (2005). Randomized controlled trial comparing brief dynamic and supportive therapy with waiting list condition in minor depressive disorders. *Psychother Psychosom*, *74*, 43-50.
- Marmar, C. R., Horowitz, M. J., Weiss, D. S., Wilner, N. R., & Kaltreider, N. B. (1988). A controlled trial of brief psychotherapy and mutual-help group treatment of conjugal bereavement. *Am J Psychiatry*, *145*, 203-209.

- McCallum, M., & Piper, W. E. (1990). A controlled study of effectiveness and patient suitability for short-term group psychotherapy. *Int J Group Psychother*, *40*, 431-452.
- McLean, P., & Hakstian, A. (1979). Clinical depression: comparative efficacy of outpatient treatments. *J Consult Clin Psychol*, *47*, 818-836.
- McMain, S. F., Links, P. S., Gnam, W. H., Guimond, T., Cardish, R. J., & Korman, L., et al. (2009). A randomized trial of dialectical behavior therapy versus general psychiatric management for borderline personality disorder. *Am J Psychiatry*, *166*, 1365-1374.
- Meyer, A. E., & Bolz, W. (1981). The Hamburg short psychotherapy comparison experiment. Foreward and introduction. *Psychother Psychosom*, *35*, 81-84.
- Milrod, B., Leon, A. C., Busch, F., Rudden, M., Schwalberg, M., & Clarkin, J., et al. (2007). A randomized controlled clinical trial of psychoanalytic psychotherapy for panic disorder. *Am J Psychiatry*, *164*, 265-272.
- Munroe-Blum, H., & Marziali, E. (1995). A controlled trial of short-term group treatment for borderline personality disorder. *J Personal Disord*, *9*, 190-198.
- Öjehagen, A., Berglund, M., Appel, C. P., Andersson, K., Nilsson, B., & Skjaeris, A., et al. (1992). A randomized study of long-term out-patient treatment in alcoholics. Psychiatric treatment versus multimodal behavioural therapy, during 1 versus 2 years of treatment. *Alcohol Alcohol*, *27*, 649-658.
- Pierloot, R., & Vinck, J. (1978). Differential outcome of short-term dynamic psychotherapy and systematic desensitizations in the treatment of anxious outpatients: A preliminary report. *Psychologica Belgica*, *18*, 87-98.
- Piper, W. E., Azim, H. F., McCallum, M., & Joyce, A. S. (1990). Patient suitability and outcome in short-term individual psychotherapy. *J Consult Clin Psychol*, *58*, 475-481.
- Piper, W. E., Debbane, E. G., Bienvenu, J. P., & Garant, J. (1984). A comparative study of four forms of psychotherapy. *J Consult Clin Psychol*, *52*, 268-279.
- Piper, W. E., McCallum, M., Joyce, A. S., Rosie, J. S., & Ogrodniczuk, J. S. (2001). Patient personality and time-limited group psychotherapy for complicated grief. *Int J Group Psychother*, *51*, 525-552.

Poulsen, A. (1991). Psychodynamic, time-limited group therapy in rheumatic disease--a controlled study with special reference to alexithymia. *Psychother Psychosom*, *56*, 12-23.

Robin, A. L., Siegel, P. T., Moye, A. W., Gilroy, M., Dennis, A. B., & Sikand, A., et al. (1999). A controlled comparison of family versus individual therapy for adolescents with anorexia nervosa. *J Am Acad Child Adolesc Psychiatry*, *38*, 1482-1489.

Rosser, R., Denford, J., Heslop, A., Kinston, W., Macklin, D., & Minty, K., et al. (1983). Breathlessness and psychiatric morbidity in chronic bronchitis and emphysema: a study of psychotherapeutic management. *Psychol Med*, *13*, 93-110.

Salminen, J. K., Karlsson, H., Hietala, J., Kajander, J., Aalto, S., & Markkula, J., et al. (2008). Short-term psychodynamic psychotherapy and fluoxetine in major depressive disorder: a randomized comparative study. *Psychother Psychosom*, *77*, 351-357.

Sanchez, V. C., Lewinsohn, P. M., & Larson, D. W. (1980). Assertion training: effectiveness in the treatment of depression. *J Clin Psychol*, *36*, 526-529.

Sandahl, C., Herlitz, K., Ahlin, G., & Rönnerberg, S. (1998). Time-limited group psychotherapy for moderately alcohol dependent patients: A randomized controlled clinical trial. *Psychotherapy Research*, *8*, 361-378.

Saunders, D. G. (1996). Feminist-cognitive-behavioral and process-psychodynamic treatments for men who batter: interaction of abuser traits and treatment models. *Violence Vict*, *11*, 393-414.

Shaffer, H. J., LaSalvia, T. A., & Stein, J. P. (1997). Comparing Hatha yoga with dynamic group psychotherapy for enhancing methadone maintenance treatment: a randomized clinical trial. *Altern Ther Health Med*, *3*, 57-66.

Shapiro, D. A., Barkham, M., Rees, A., Hardy, G. E., Reynolds, S., & Startup, M., et al. (1994). Effects of treatment duration and severity of depression on the effectiveness of cognitive-behavioral and psychodynamic-interpersonal psychotherapy. *J Consult Clin Psychol*, *62*, 522-534.

Shefler, G., Dasberg, H., & Ben-Shakhar, G. (1995). A randomized controlled outcome and follow-up study of Mann's time-limited psychotherapy. *J Consult Clin Psychol*, *63*, 585-593.

Simpson, S., Corney, R., Fitzgerald, P., & Beecham, J. (2003). A randomized controlled trial to evaluate the effectiveness and cost-effectiveness of psychodynamic counselling for general practice patients with chronic depression. *Psychol Med*, *33*, 229-239.

Sjodin, I., Svedlund, J., Ottosson, J. O., & Dotevall, G. (1986). Controlled study of psychotherapy in chronic peptic ulcer disease. *Psychosomatics*, *27*, 187-91, 195.

Sloane, R. B., Staples, F. R., Cristol, A. H., Yorkston, N. J., & Whipple, K. (1975). Short-term analytically oriented psychotherapy versus behavior therapy. *American Journal of Psychiatry*, *132*, 373-377.

Smyrniotis, K. X., & Kirkby, R. J. (1993). Long-term comparison of brief versus unlimited psychodynamic treatments with children and their parents. *J.Consult.Clin.Psychol.*, *61*, 1020-1027.

Stanton, A. H., Gunderson, J. G., Knapp, P. H., Frank, A. F., Vancelli, M. L., & Schnitzer, R., et al. (1984). Effects of psychotherapy in schizophrenia: I. Design and implementation of a controlled study. *Schizophr Bull*, *10*, 520-563.

Svartberg, M., Seltzer, M. H., & Stiles, T. C. (1998). The effects of common and specific factors in short-term anxiety-provoking psychotherapy: a pilot process-outcome study. *J Nerv Ment Dis*, *186*, 691-696.

Svartberg, M., Stiles, T. C., & Seltzer, M. H. (2004). Randomized, controlled trial of the effectiveness of short-term dynamic psychotherapy and cognitive therapy for cluster C personality disorders. *Am J Psychiatry*, *161*, 810-817.

Svedlund, J., Sjodin, I., Ottosson, J. O., & Dotevall, G. (1983). Controlled study of psychotherapy in irritable bowel syndrome. *Lancet*, *2*, 589-592.

Szapocznik, J., Rio, A., Murray, E., Cohen, R., Scopetta, M., & Rivas-Vazquez, A., et al. (1989). Structural family versus psychodynamic child therapy for problematic Hispanic boys. *J.Consult.Clin.Psychol.*, *57*, 571-578.

Sørensen, P., Birket-Smith, M., Wattar, U., Buemann, I., & Salkovskis, P. (2010). A randomized clinical trial of cognitive behavioural therapy versus short-term psychodynamic psychotherapy versus no intervention for patients with hypochondriasis. *Psychol Med*, 1-11.

Tasca, G., Ritchie, K., Conrad, G., Balfour, L., Gayton, J., & Lybanon, V., et al. (2006). Attachment scales predict outcome in a randomized controlled trial of two group therapies for binge eating disorder: An aptitude by treatment interaction. *Psychotherapy Research*, *16*, 106-121.

Thompson, L. W., Gallagher, D., & Breckenridge, J. S. (1987). Comparative effectiveness of psychotherapies for depressed elders. *J Consult Clin Psychol*, *55*, 385-390.

Thyme, K. E., Sundin, E. C., Stahlberg, G., Lindstrom, B., Eklof, H., & Wiberg, B., et al. (2007). The outcome of short-term psychodynamic art therapy compared to short-term psychodynamic verbal therapy for depressed women. *Psychoanalytic Psychotherapy*, *21*, 250-264.

Treasure, J., Todd, G., Brolly, M., Tiller, J., Nehmed, A., & Denman, F., et al. (1995). A pilot study of a randomised trial of cognitive analytical therapy vs educational behavioral therapy for adult anorexia nervosa. *Behav Res Ther*, *33*, 363-367.

Trowell, J., Joffe, I., Campbell, J., Clemente, C., Almqvist, F., & Soininen, M., et al. (2007). Childhood depression: a place for psychotherapy. An outcome study comparing individual psychodynamic psychotherapy and family therapy. *Eur Child Adolesc Psychiatry*, *16*, 157-167.

Trowell, J., Kolvin, I., Weeramanthri, T., Sadowski, H., Berelowitz, M., & Glaser, D., et al. (2002). Psychotherapy for sexually abused girls: psychopathological outcome findings and patterns of change. *Br J Psychiatry*, *180*, 234-247.

Vinnars, B., Barber, J. P., Norén, K., Gallop, R., & Weinryb, R. M. (2005). Manualized supportive-expressive psychotherapy versus nonmanualized community-delivered psychodynamic therapy for patients with personality disorders: bridging efficacy and effectiveness. *Am J Psychiatry*, *162*, 1933-1940.

Vitriol, V. G., Ballesteros, S. T., Florenzano, R. U., Weil, K. P., & Benadof, D. F. (2009). Evaluation of an outpatient intervention for women with severe depression and a history of childhood trauma. *Psychiatr Serv*, *60*, 936-942.

Wiborg, I. M., & Dahl, A. A. (1996). Does brief dynamic psychotherapy reduce the relapse rate of panic disorder? *Arch Gen Psychiatry*, *53*, 689-694.

Wiltink, J., Dippel, A., Szczepanski, M., Thiede, R., Alt, C., & Beutel, M. E., et al. (2007). Long-term weight loss maintenance after inpatient psychotherapy of severely obese patients based on a randomized study: predictors and maintaining factors of health behavior. *J Psychosom Res*, *62*, 691-698.



Winston, A., Pollack, J., McCullough, L., Flegenheimer, W., Kestenbaum, R., & Trujillo, M., et al. (1991). Brief psychotherapy of personality disorders. *J Nerv Ment Dis*, *179*, 188-193.

Woody, G. E., Luborsky, L., McLellan, A. T., O'Brien, C. P., Beck, A. T., & Blaine, J., et al. (1983). Psychotherapy for opiate addicts. Does it help? *Arch Gen Psychiatry*, *40*, 639-645.

Woody, G. E., McLellan, A. T., Luborsky, L., & O'Brien, C. P. (1995). Psychotherapy in community methadone programs: A validation study. *American Journal of Psychiatry*, *152*, 1302-1308.
